# Supplementary material for: Nuclear PD-L1 promotes EGR1-mediated angiogenesis and accelerates tumorigenesis
Source: PubMed Central journal article supplement (PMC10050073; doi:10.1038/s41421-023-00521-7), 2023-03-28
Supplement: 41421_2023_521_MOESM1_ESM.pdf [file 41421_2023_521_MOESM1_ESM.pdf]

# Supplementary information

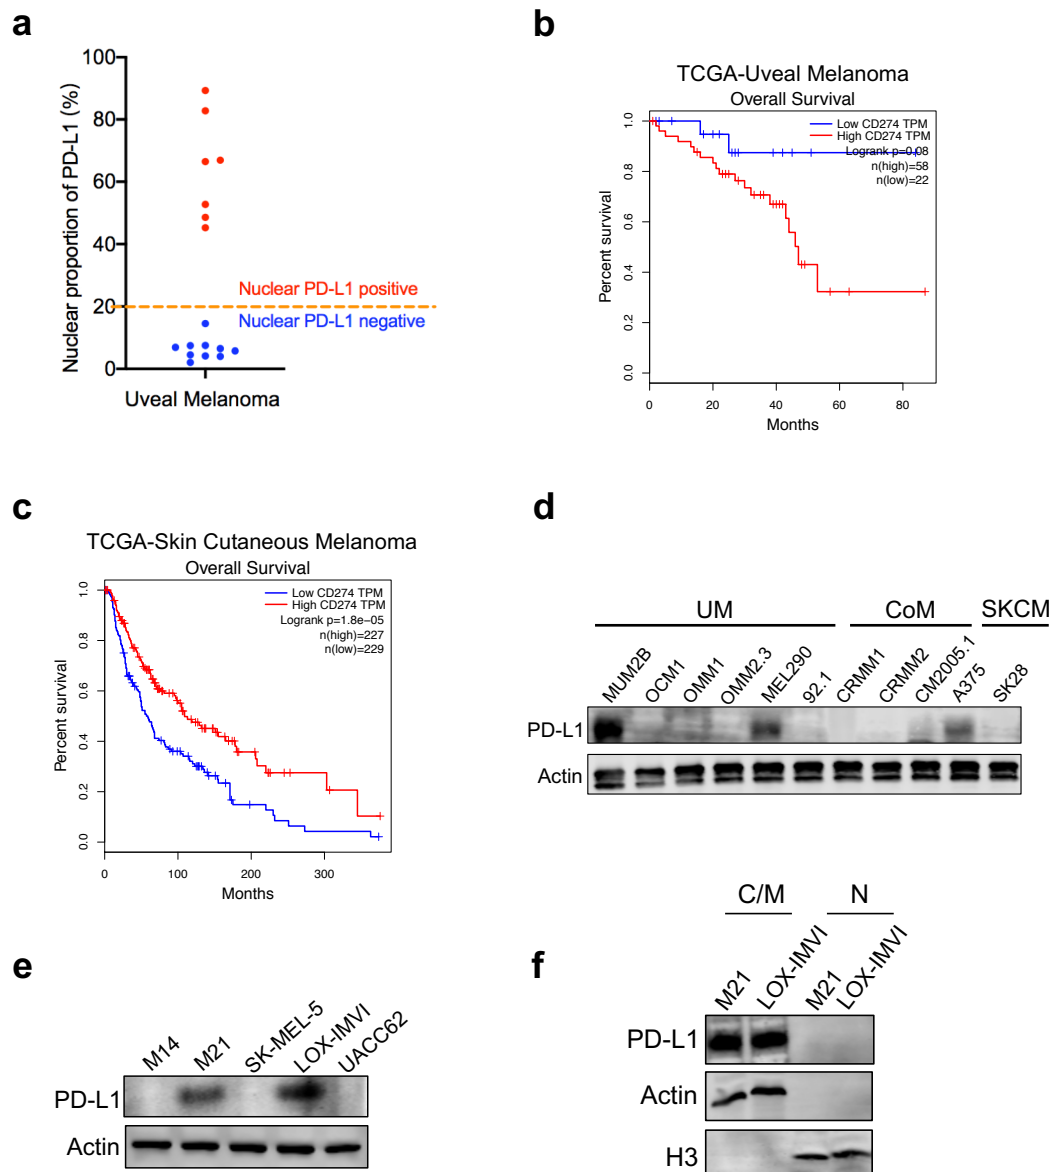

**Supplementary Fig. 1. PD-L1 expression in uveal melanoma.** **a** Definition of nPD-L1 positive and negative groups according to the 20% proportion of nPD-L1. **b, c** Kaplan-Meier analysis of the overall survival of UM (**b**) and SKCM (**c**) patients with low and high PD-L1 expression levels queried by TCGA database. **d** Western blot analysis of PD-L1 expression levels in UM (MUM2B, OCM1, OMM1, OMM2.3, MEL290 and 92.1), CoM (CRMM1, CRMM2 and CM2005.1), and SKCM (A375 and SK28) cell lines. **e** Western Blot detection of PD-L1 in SKCM (M14, M21, SK-MEL-5, LOX-IMVI and UACC62) cells. **f** Western blot analysis of cytoplasmic/membrane (C/M) and nuclear (N) fractions of PD-L1 in above SKCM cells.

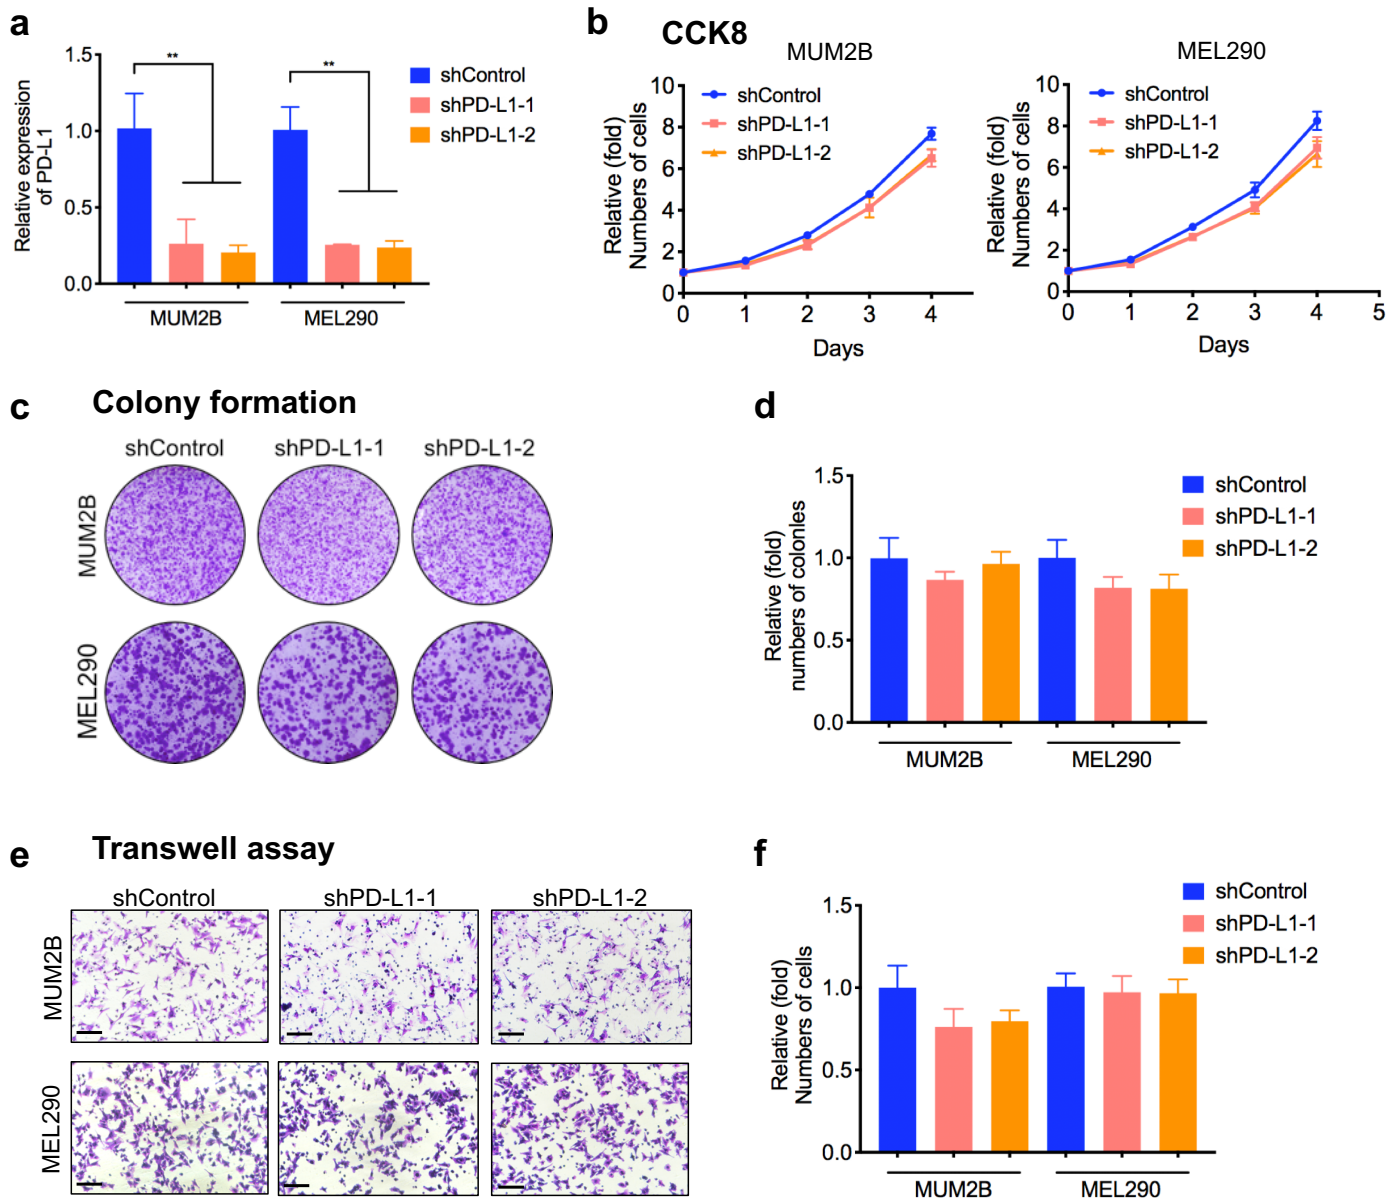

**Supplementary Fig. 2. PD-L1 knockdown had no significant effect on uveal melanoma cell proliferation and migration.** **a** Stable silencing of PD-L1 in MUM2B and MEL290 cells verified by RT-PCR. **b** CCK8 assay that investigates the effect of PD-L1 silencing on cell proliferation ability. **c** Colony formation assay that investigates the effect of PD-L1 silencing on cell colony formation ability. **d** Statistical analysis of the colony formation assay.  $n = 3$ . Data are presented as means  $\pm$  SD. Two-tailed unpaired Student's  $t$ -tests. **e** Transwell assay that investigates the effect of PD-L1 silencing on cell migration ability. **f** Statistical analysis of the transwell assay.  $n = 3$ . Data are presented as means  $\pm$  SD. Two-tailed unpaired Student's  $t$ -tests.

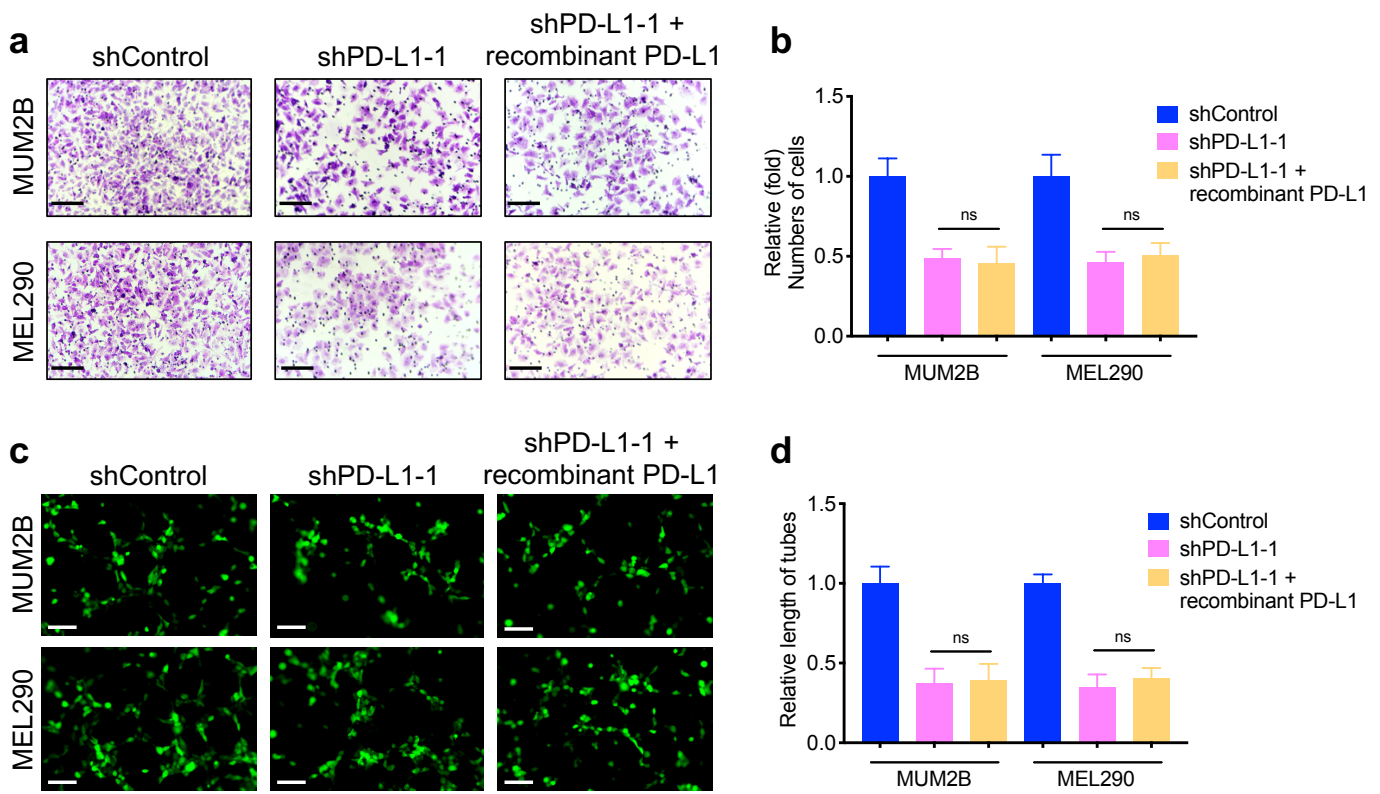

**Supplementary Fig. 3. Recombinant PD-L1 failed to restore angiogenesis in PD-L1-depleted cells.** **a** HUVEC migration assay that investigates the effect of recombinant PD-L1 in PD-L1-depleted cells on the migration ability of HUVECs. Scale bars, 50  $\mu$ m. **b** Statistical analysis of the HUVEC migration assay.  $n = 3$ . Data are presented as means  $\pm$  SD. Two-tailed unpaired Student's  $t$ -tests. **c** HUVEC tube formation assay that investigates the effect of recombinant PD-L1 in PD-L1-depleted cells on HUVEC tubule formation. Scale bars, 25  $\mu$ m. **d** Statistical analysis of the HUVEC tube formation assay.  $n = 3$ . Data are presented as means  $\pm$  SD. Two-tailed unpaired Student's  $t$ -tests.

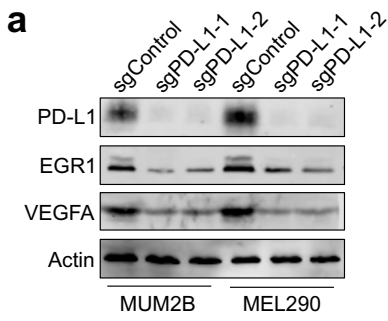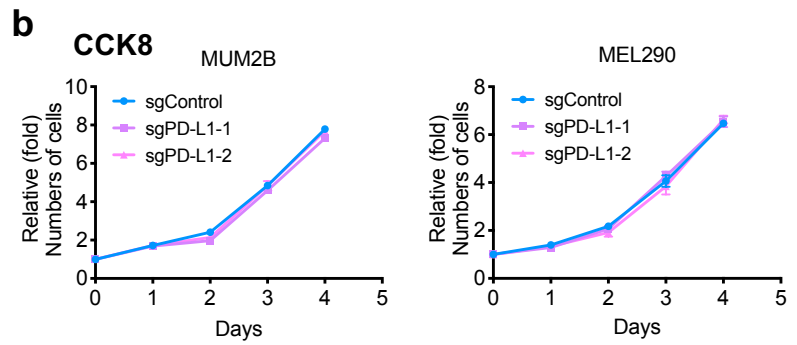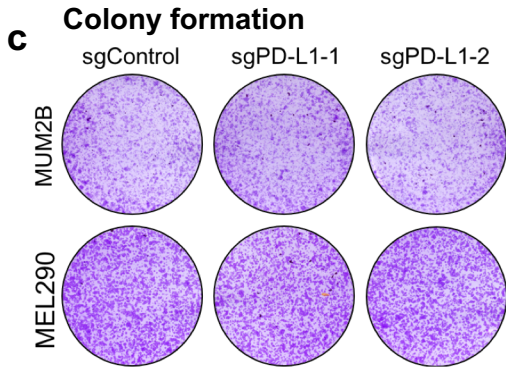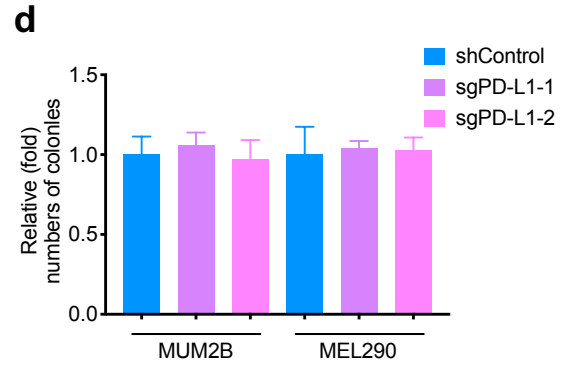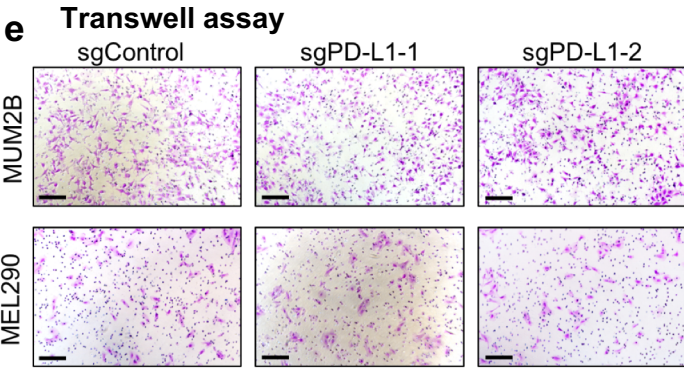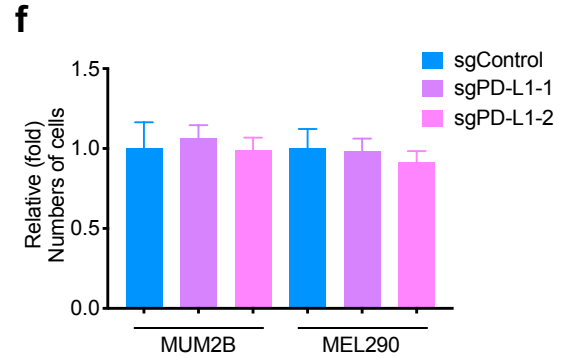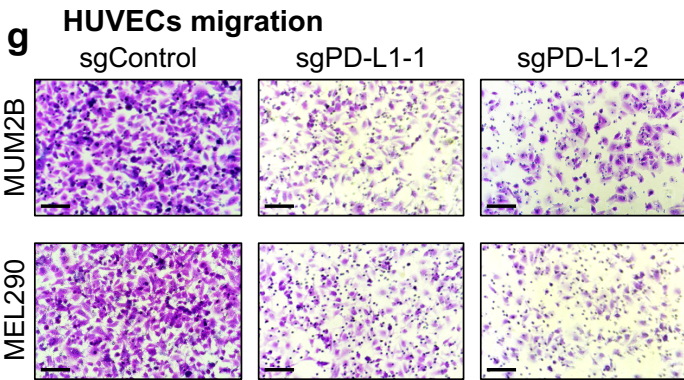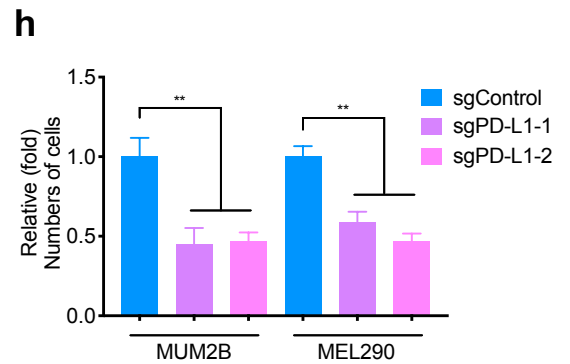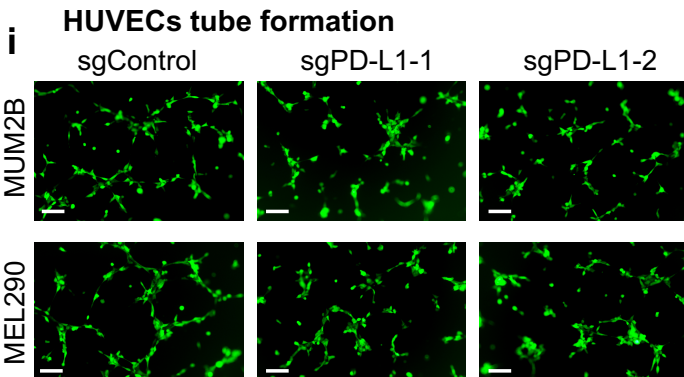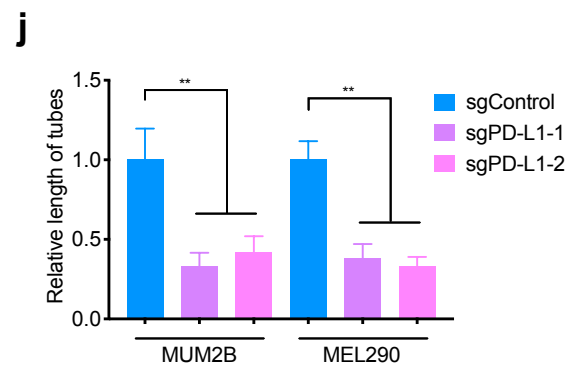

**Supplementary Fig. 4. PD-L1 knockout did not significantly alter proliferation and migration in uveal melanoma cells.** **a** Stable knockout of PD-L1 in MUM2B and MEL290 cells verified by Western blot. **b** CCK8 assay that investigates the effect of PD-L1 knockout on cell proliferation ability. **c** Colony formation assay that investigates the effect of PD-L1 knockout on cell colony formation ability. **d** Statistical analysis of the colony formation assay.  $n = 3$ . Data are presented as means  $\pm$  SD. Two-tailed unpaired Student's  $t$ -tests. **e** Tranwell assay that investigates the effect of PD-L1 knockout on cell migration ability. Scale bars, 50  $\mu\text{m}$ . **f** Statistical analysis of the tranwell assay.  $n = 3$ . Data are presented as means  $\pm$  SD. Two-tailed unpaired Student's  $t$ -tests. **g** HUVEC migration assay that investigates the effect of conditional medium from PD-L1-knockout cells and control cells on the migration ability of HUVECs. Scale bars, 50  $\mu\text{m}$ . **h** Statistical analysis of the HUVEC migration assay.  $n = 3$ . Data are presented as means  $\pm$  SD. Two-tailed unpaired Student's  $t$ -tests. **i** HUVEC tube formation assay that investigates the effect of conditional medium from PD-L1-knockout cells and control cells on HUVEC tubule formation. Scale bars, 50  $\mu\text{m}$ . **j** Statistical analysis of the HUVEC tube formation assay.  $n = 3$ . Data are presented as means  $\pm$  SD. Two-tailed unpaired Student's  $t$ -tests.

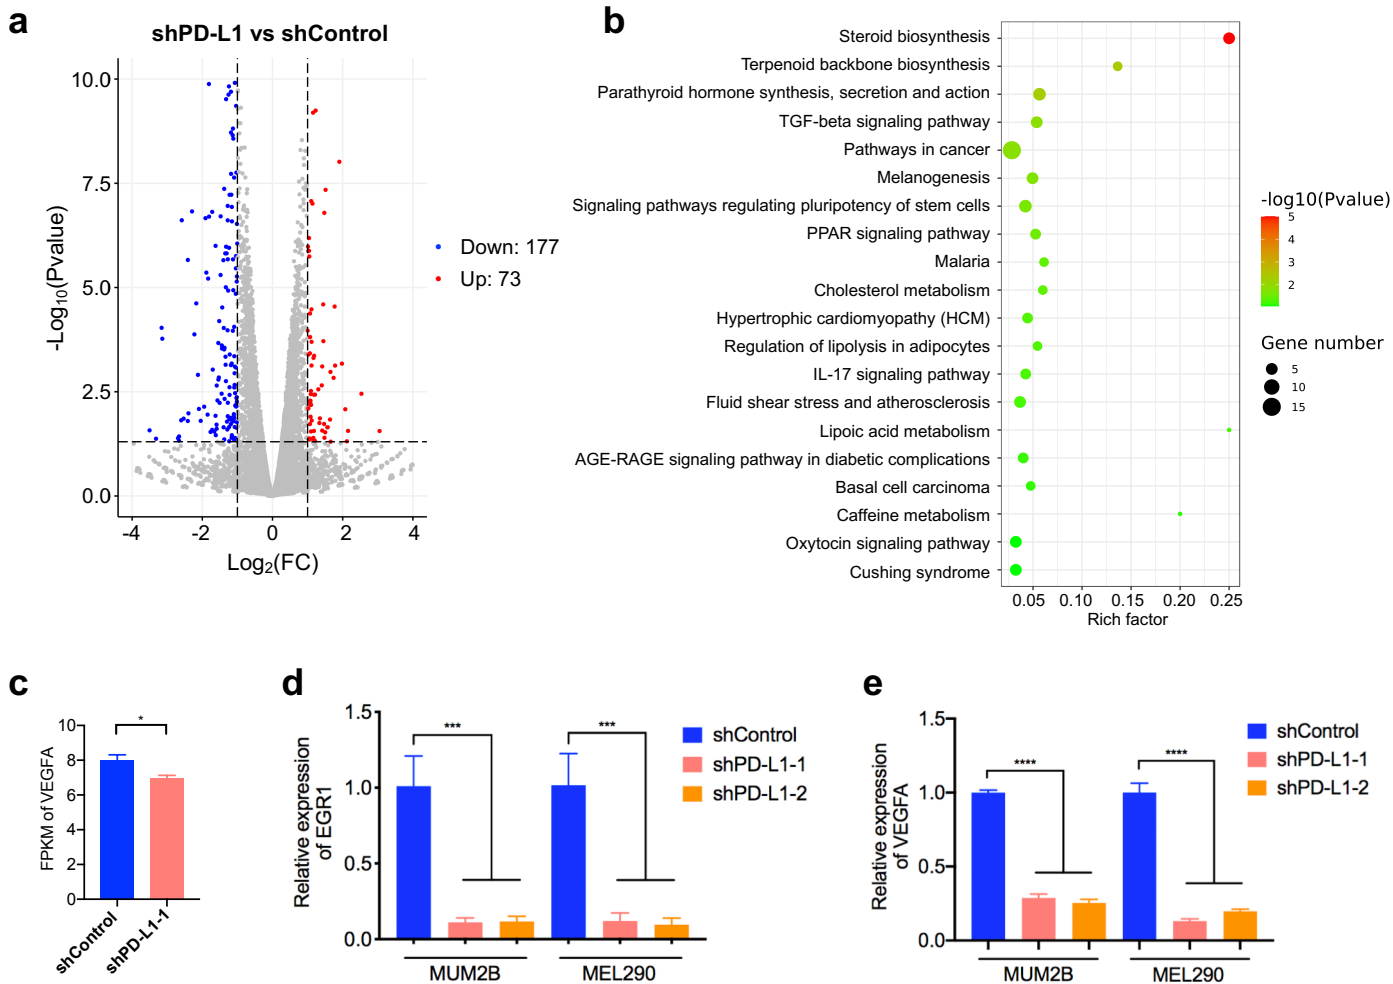

**Supplementary Fig. 5. RNA-seq of PD-L1 silencing in uveal melanoma. a** Volcano plot of dysregulated genes in PD-L1 silenced cells. **b** Kyoto Encyclopedia of Genes and Genomes (KEGG) analysis of dysregulated genes in PD-L1 silenced cells. **c** FPKM for VEGFA expression from RNA-seq analysis of PD-L1 silenced cells and control cells. **d, e** RT-PCR detecting relative EGR1 (**d**) and VEGFA (**e**) mRNA expression in MUM2B and MEL290 cells after PD-L1 knocking down.  $n = 3$ . Data are presented as means  $\pm$  SD. Two-tailed unpaired Student's  $t$ -tests.

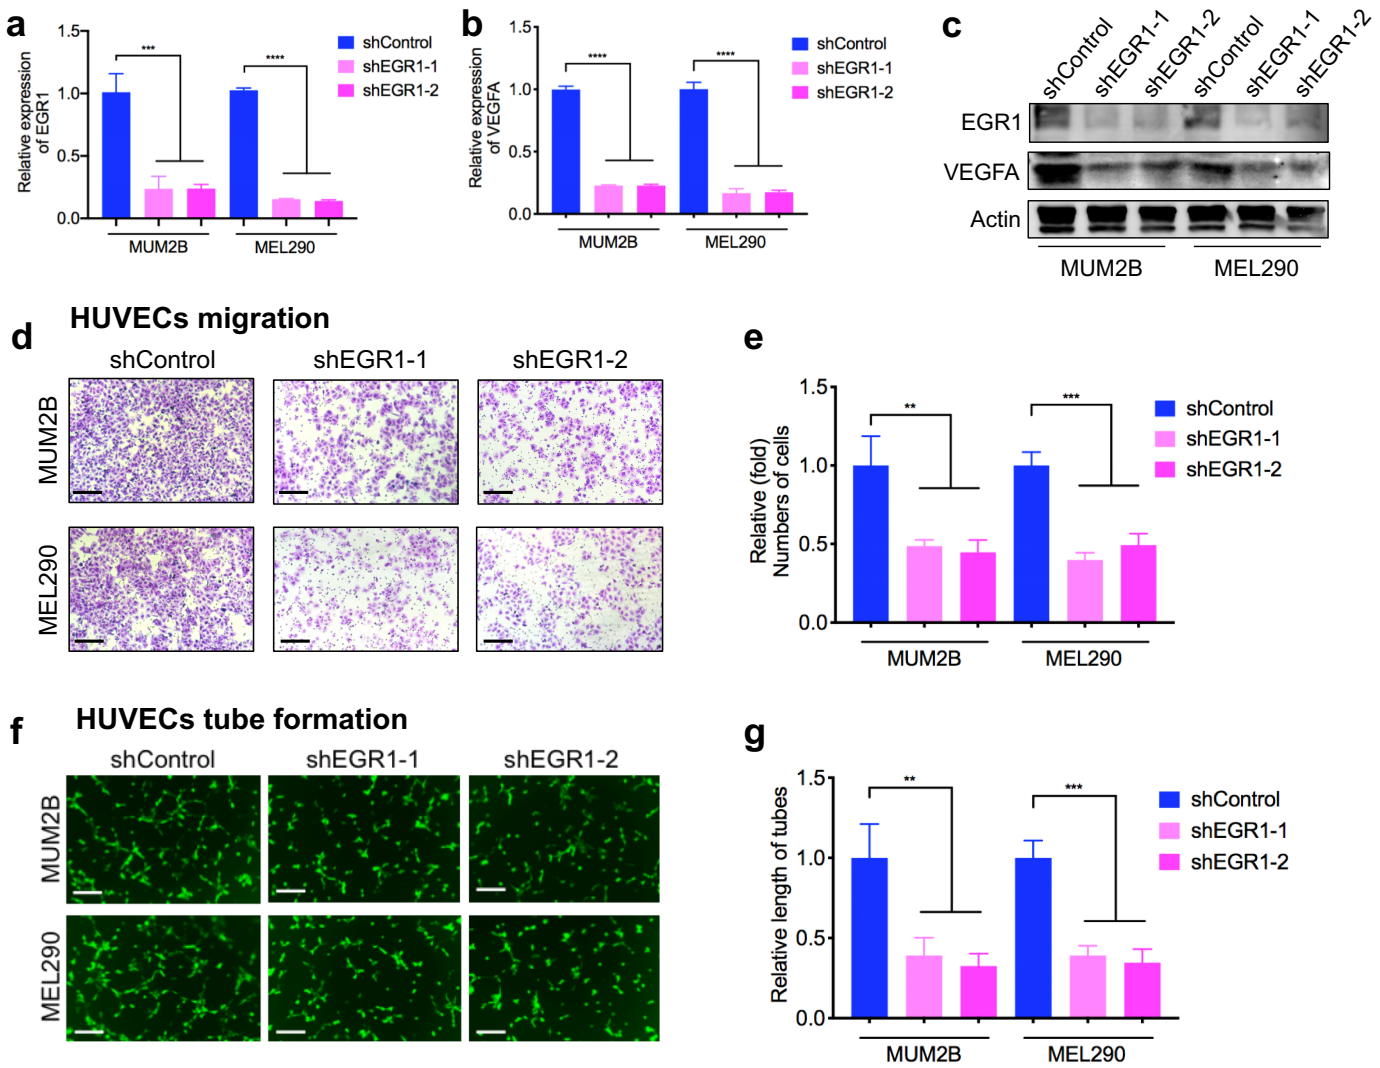

**Supplementary Fig. 6. EGR1 facilitates angiogenesis in uveal melanoma.** **a, b** RT-PCR detecting relative EGR1 (**a**) and VEGFA (**b**) mRNA expression in MUM2B and MEL290 cells after EGR1 knocking down. **c** Western blot images showing the protein levels of EGR1 and VEGFA in EGR1 silenced cells and control cells. **d** HUVECs migration assay that investigates the effect of conditional medium from EGR1 silenced cells and control cells on the migration ability of HUVECs. Scale bars, 50  $\mu$ m. **e** Statistical analysis of the HUVECs migration assay.  $n = 3$ . Data are presented as means  $\pm$  SD. Two-tailed unpaired Student's  $t$ -tests. **f** HUVECs tube formation assay that investigates the effect of conditional medium from EGR1 silenced cells and control cells on HUVECs tubule formation. Scale bars, 50  $\mu$ m. **g** Statistical analysis of the HUVECs tube formation assay.  $n = 3$ . Data are presented as means  $\pm$  SD. Two-tailed unpaired Student's  $t$ -tests.

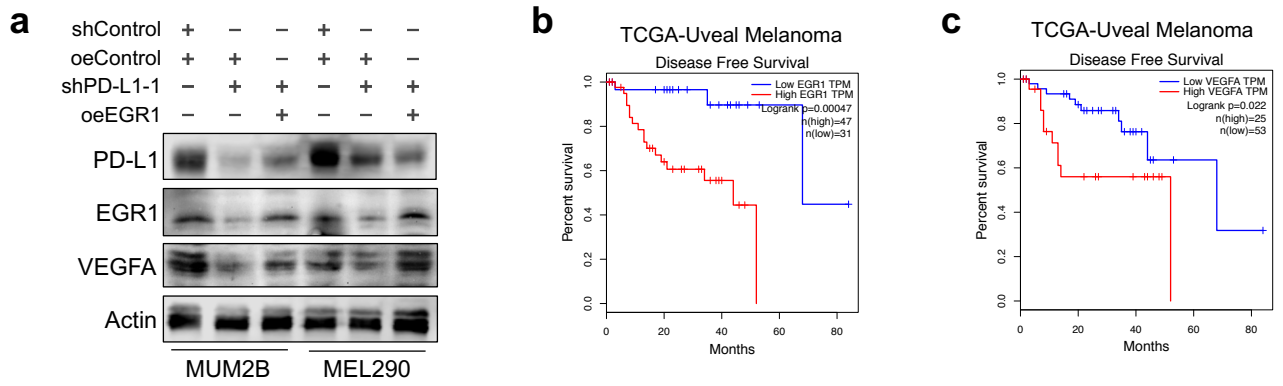

**Supplementary Fig. 7. Validation of EGR1 restoration efficiency.** **a** Western blot images showing the protein levels of PD-L1, EGR1 and VEGFA in PD-L1 silenced cells after EGR1 restoration. **b, c** Kaplan-Meier analysis of the disease free survival of UM patients with low and high EGR1 (**b**) and VEGFA (**c**) expression levels queried by TCGA database.



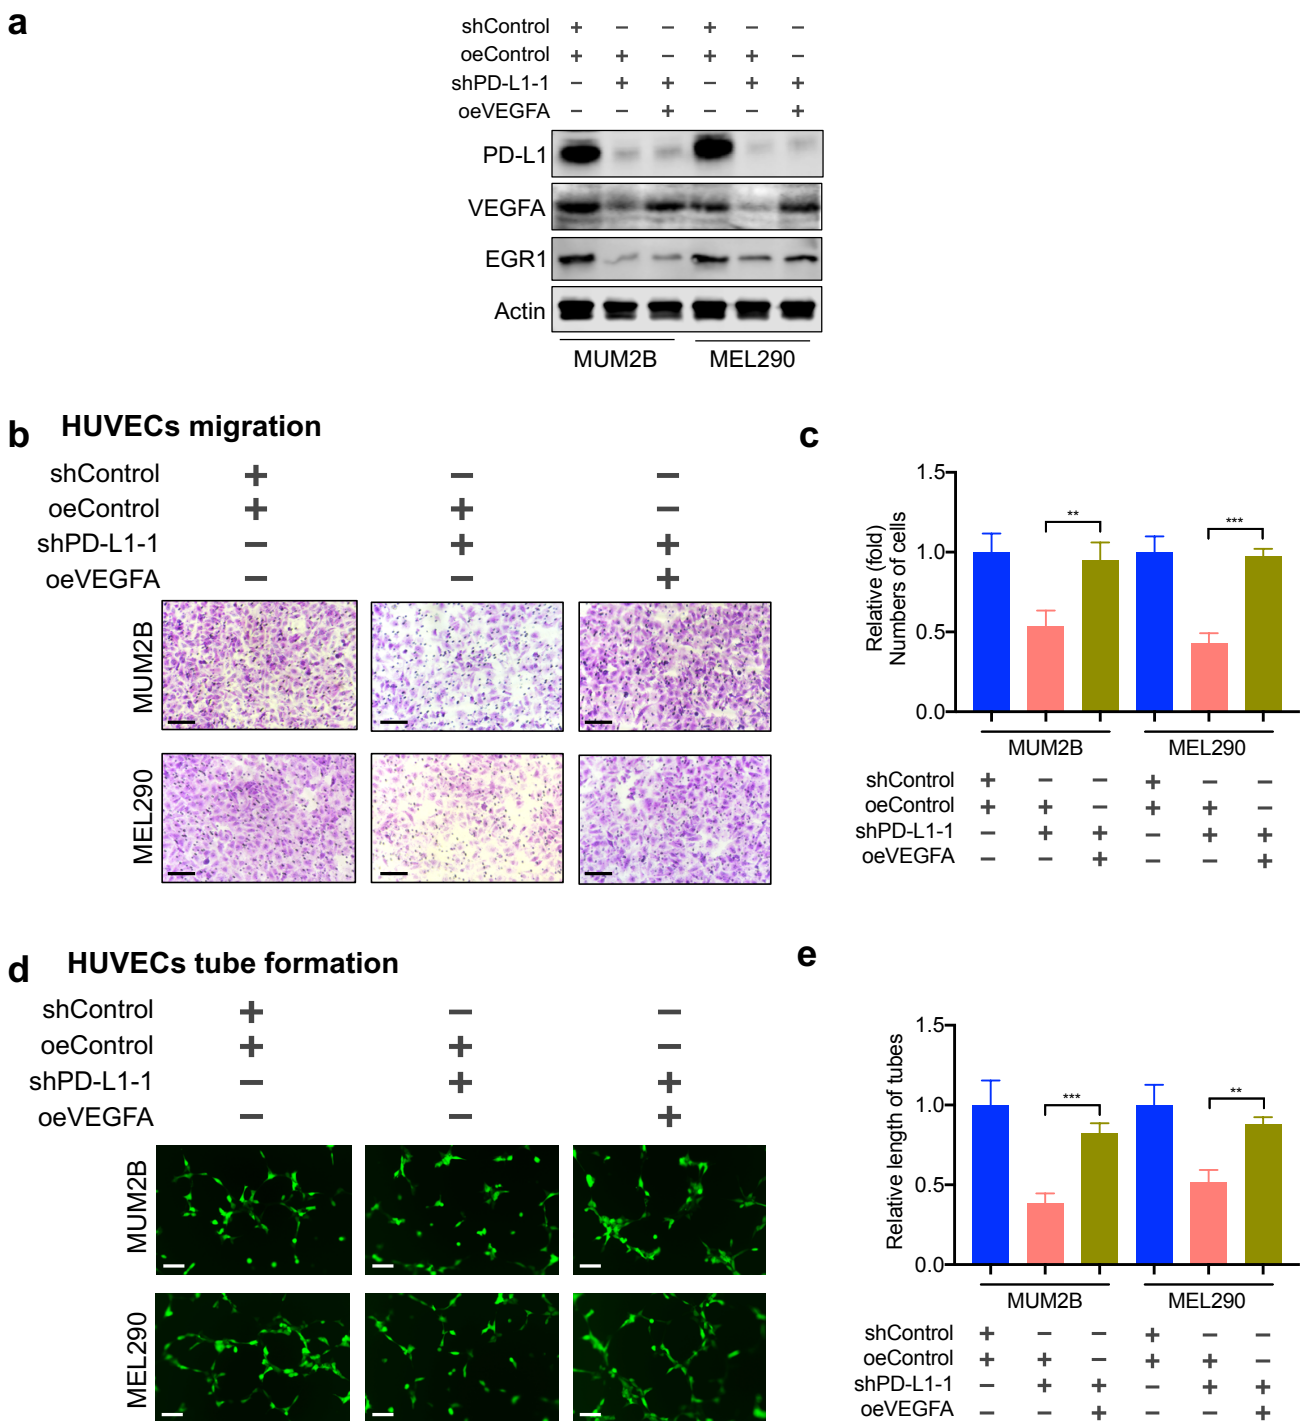

**Supplementary Fig. 8. Restoration of VEGFA rescued pro-angiogenesis capacity in PD-L1-silenced cells.** **a** Western blot images showing the protein levels of PD-L1, EGR1 and VEGFA in PD-L1 silenced cells after VEGFA restoration. **b** HUVEC migration assay that investigates the effect of VEGFA re-expression in PD-L1-silenced cells on the migration ability of HUVECs. Scale bars, 50  $\mu$ m. **c** Statistical analysis of the HUVEC migration assay.  $n = 3$ . Data are presented as means  $\pm$  SD. Two-tailed unpaired Student's  $t$ -tests. **d** HUVEC tube formation assay that investigates the effect of VEGFA re-expression in PD-L1-silenced cells on HUVEC tubule formation. Scale bars, 25  $\mu$ m. **e** Statistical analysis of the HUVEC tube formation assay.  $n = 3$ . Data are presented as means  $\pm$  SD. Two-tailed unpaired Student's  $t$ -tests.

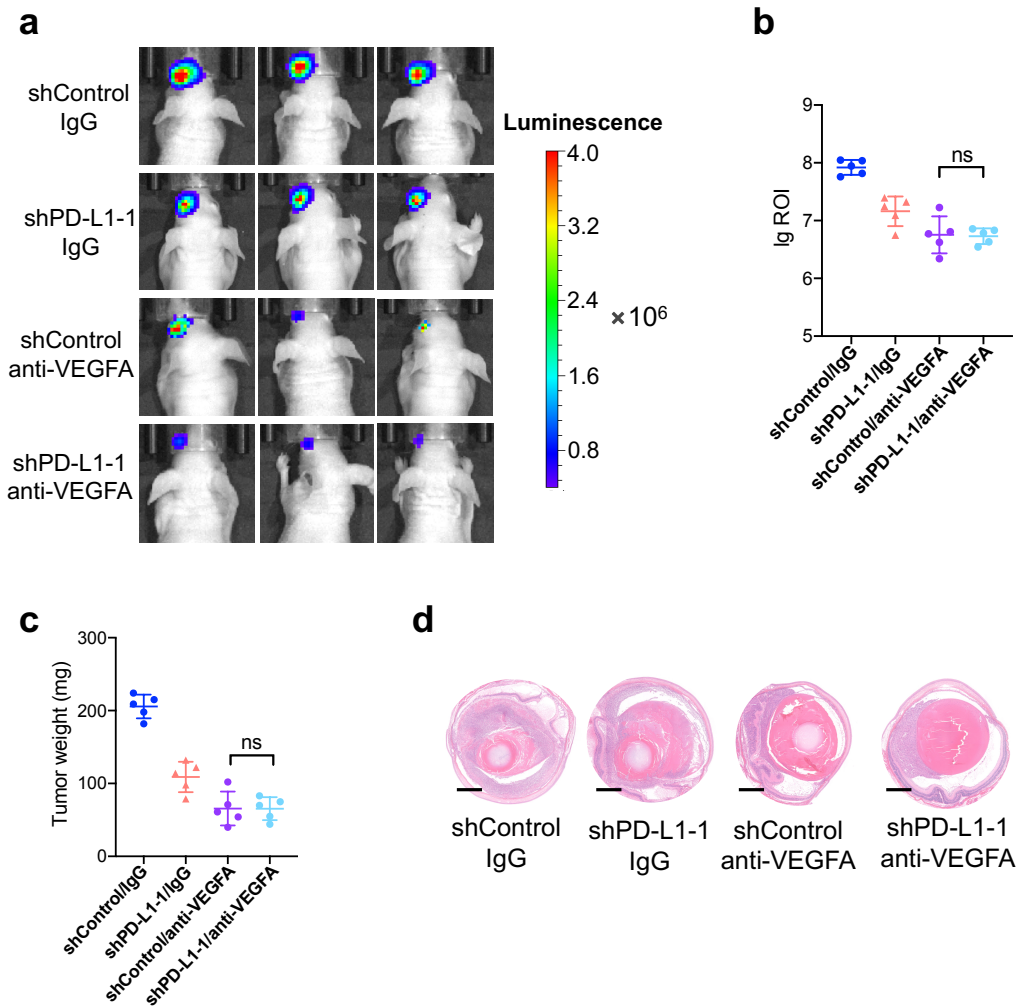

**Supplementary Fig. 9. Combined anti-VEGF and PD-L1 silencing treatment in UM.** **a** Representative bioluminescent images of UM orthotopic xenografts generated by tumor cells with indicated constructs and treated with anti-VEGFA. **b** Statistical analysis of the bioluminescent signals in UM orthotopic xenografts.  $n = 5$ . Data are presented as the means  $\pm$  SD. Two-tailed unpaired Student's  $t$ -tests. **c** Statistical analysis of the tumor weight.  $n = 5$ . Data are presented as the means  $\pm$  SD. Two-tailed unpaired Student's  $t$ -tests. **d** Representative images of H&E staining of UM orthotopic xenografts generated by tumor cells with indicated constructs and treated with anti-VEGFA.

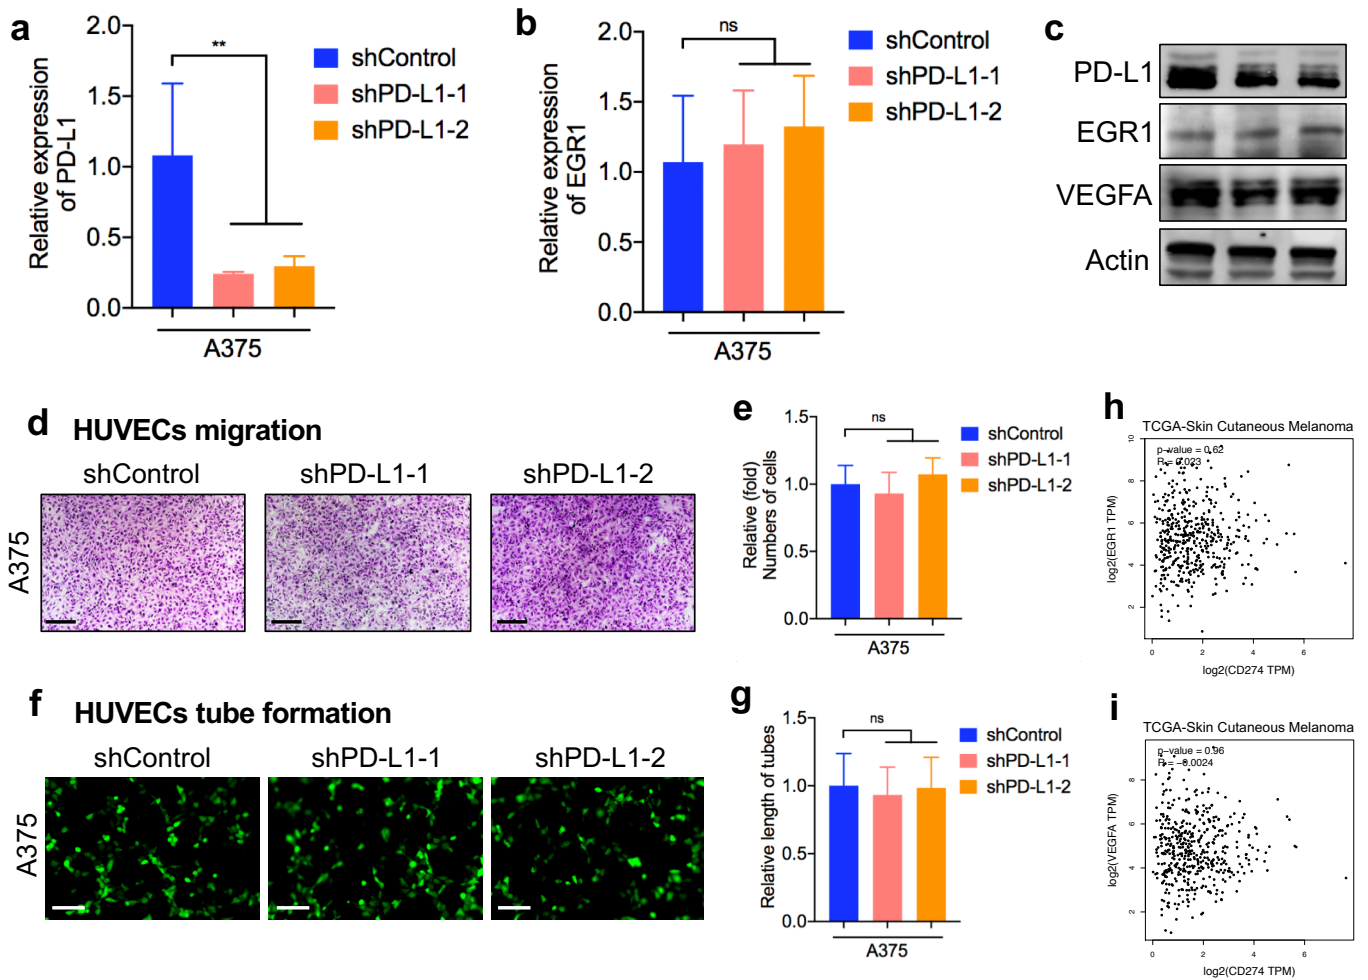

**Supplementary Fig. 10. PD-L1 failed to facilitate angiogenesis in cutaneous melanoma.** **a, b** RT-PCR detecting relative PD-L1 (**a**) and EGR1 (**b**) mRNA expression in A375 cells after PD-L1 knocking down.  $n = 3$ . Data are presented as means  $\pm$  SD. Two-tailed unpaired Student's *t*-tests. **c** Western blot images showing the protein levels of PD-L1, EGR1 and VEGFA in A375 cells after PD-L1 knocking down. **d** HUVECs migration assay that investigates the effect of conditional medium from A375 cells after PD-L1 knocking down on the migration ability of HUVECs. Scale bars, 100  $\mu$ m. **e** Statistical analysis of the HUVECs migration assay.  $n = 3$ . Data are presented as means  $\pm$  SD. Two-tailed unpaired Student's *t*-tests. **f** HUVECs tube formation assay that investigates the effect of conditional medium from A375 cells after PD-L1 knocking down on HUVECs tubule formation. Scale bars, 25  $\mu$ m. **g** Statistical analysis of the HUVECs tube formation assay.  $n = 3$ . Data are presented as means  $\pm$  SD. Two-tailed unpaired Student's *t*-tests. **h, i** Gene expression correlation analysis of PD-L1 and EGR1 (**h**), PD-L1 and EGR1 (**i**) in SKCM patients queried by TCGA database.

**a**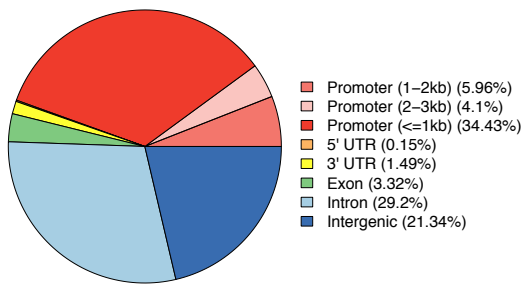**b**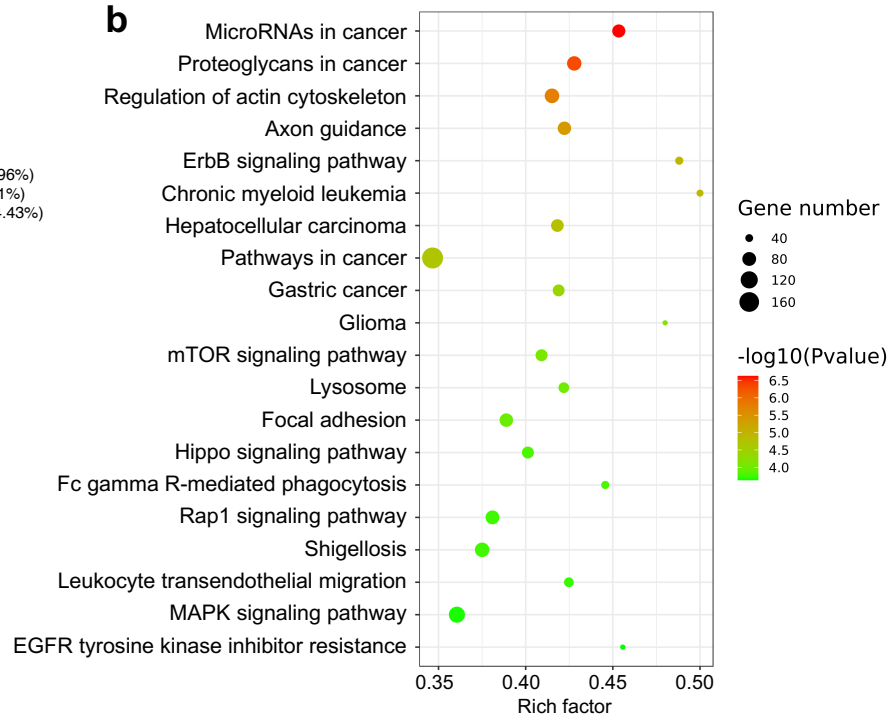

**Supplementary Fig. 11. p-STAT3 CUT&Tag analysis.** **a** The genomic distribution of down-regulated p-STAT3 CUT&Tag peaks in PD-L1 silenced cells. **b** Kyoto Encyclopedia of Genes and Genomes (KEGG) analysis shows that these down-regulated binding loci of p-STAT3 in PD-L1 silenced cells are associated with multiple oncogenic pathways.

### a HUVECs migration

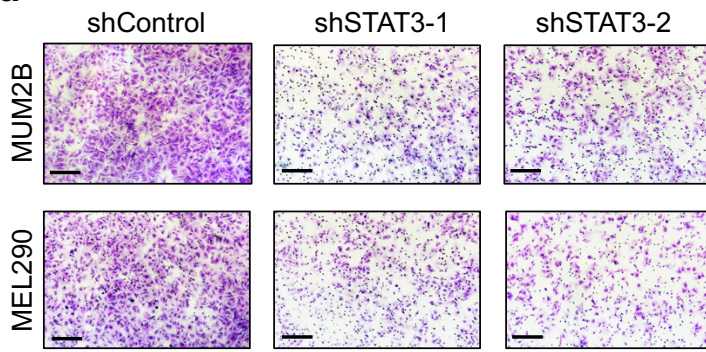

### b

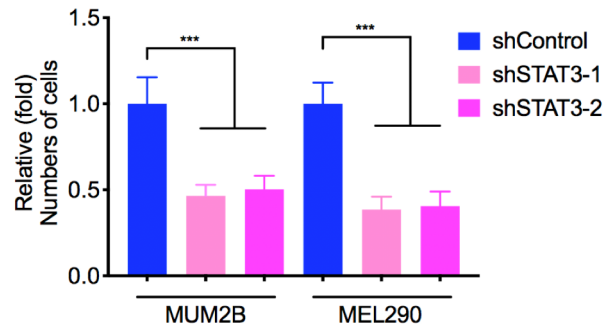

### c HUVECs tube formation

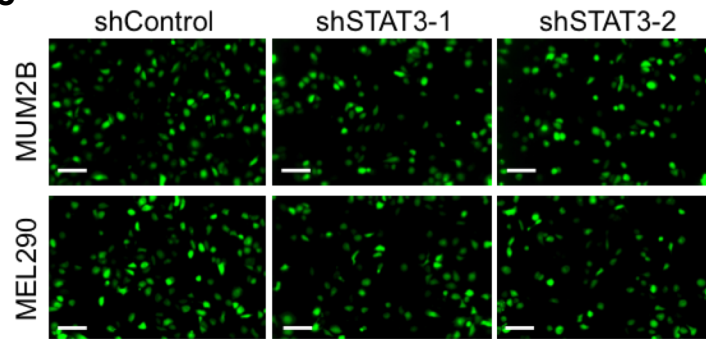

### d

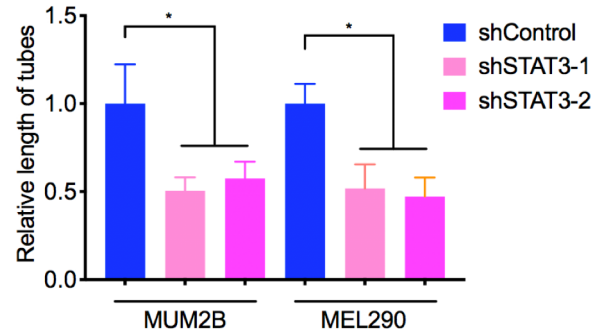

**Supplementary Fig. 12. STAT3 knockdown inhibits angiogenesis in uveal melanoma.** **a** HUVECs migration assay that investigates the effect of conditional medium from STAT3 silenced cells and control cells on the migration ability of HUVECs. Scale bars, 50  $\mu$ m. **b** Statistical analysis of the HUVECs migration assay.  $n = 3$ . Data are presented as means  $\pm$  SD. Two-tailed unpaired Student's  $t$ -tests. **c** HUVECs tube formation assay that investigates the effect of conditional medium from STAT3 silenced cells and control cells on HUVECs tubule formation. Scale bars, 25  $\mu$ m. **d** Statistical analysis of the HUVECs tube formation assay.  $n = 3$ . Data are presented as means  $\pm$  SD. Two-tailed unpaired Student's  $t$ -tests.

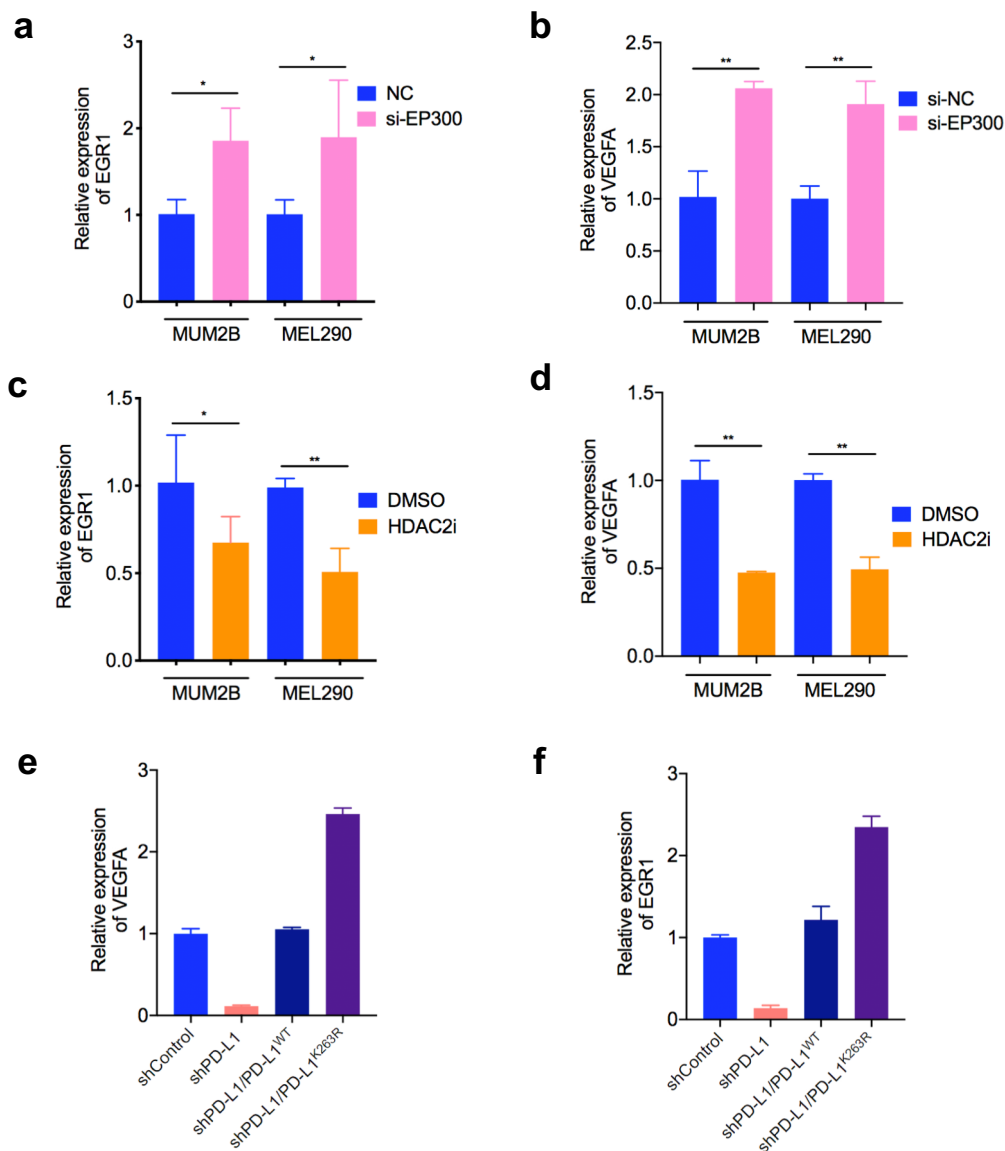

**Supplementary Fig. 13. PD-L1<sup>K263</sup> deacetylation promotes EGR1 and VEGFA expression in UM.** **a, b** RT-PCR detecting relative EGR1 (**a**) and VEGFA (**b**) mRNA expression in MUM2B and MEL290 cells transduced with si-EP300. **c, d** RT-PCR detecting relative EGR1 (**c**) and VEGFA (**d**) mRNA expression in MUM2B and MEL290 cells treated with 50  $\mu$ M HDAC2i (santacruzamate A) for 24 h. **e, f** RT-PCR detecting relative VEGFA (**e**) and EGR1 (**f**) mRNA expression in MUM2B cells treated with the indicated constructs.

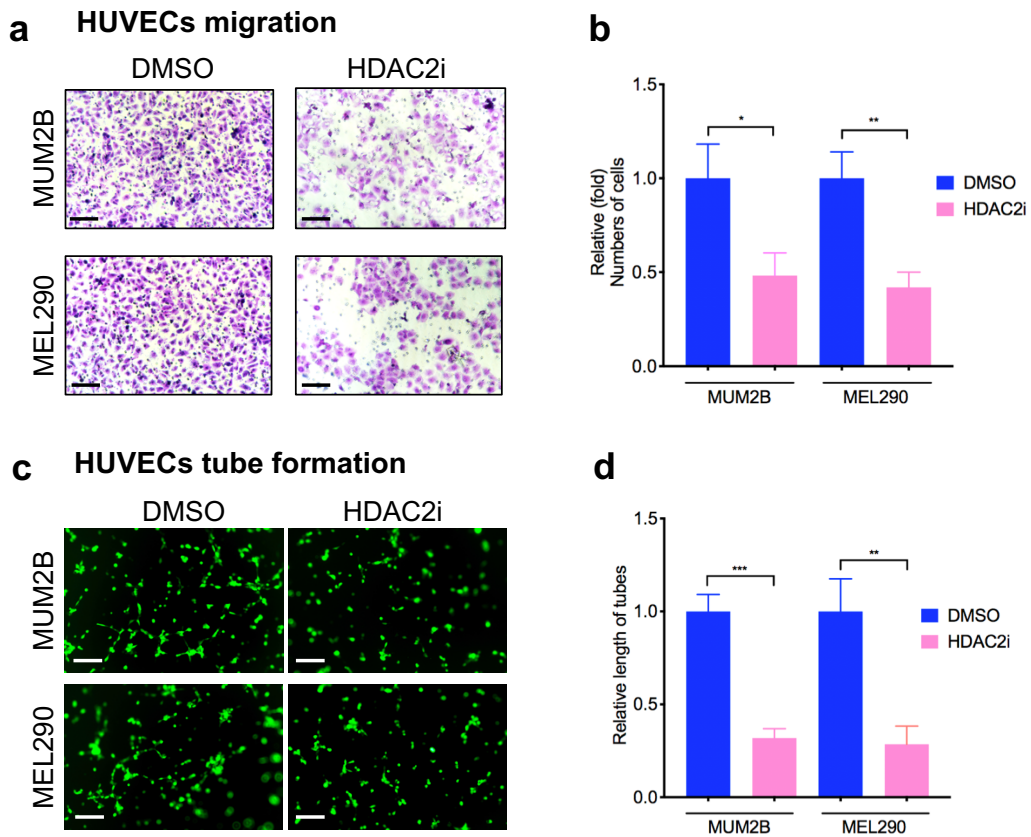

**Supplementary Fig. 14. HDAC2 inhibition inhibits angiogenesis in uveal melanoma. a.** HUVECs migration assay that investigates the effect of conditional medium from MUM2B and MEL290 cells treated with 50  $\mu$ M HDAC2i for 24 h on the migration ability of HUVECs. Scale bars, 50  $\mu$ m. **b.** Statistical analysis of the HUVECs migration assay.  $n = 3$ . Data are presented as means  $\pm$  SD. Two-tailed unpaired Student's  $t$ -tests. **c.** HUVECs tube formation assay that investigates the effect of conditional medium from MUM2B and MEL290 cells treated with 50  $\mu$ M HDAC2i for 24 h on HUVECs tubule formation. Scale bars, 50  $\mu$ m. **d.** Statistical analysis of the HUVECs tube formation assay.  $n = 3$ . Data are presented as means  $\pm$  SD. Two-tailed unpaired Student's  $t$ -tests.

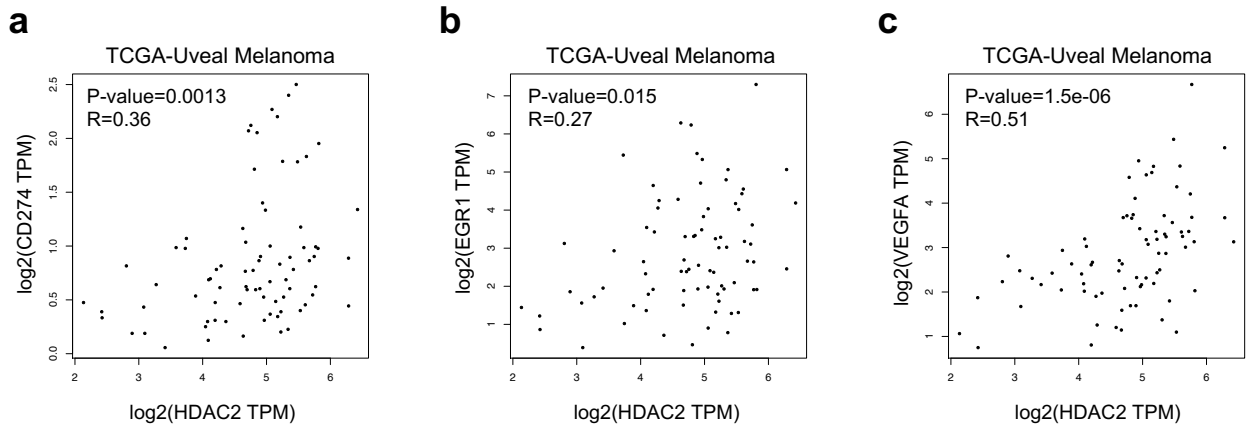

**Supplementary Fig. 15. Correlation of HDAC2 with CD274, EGR1 and VEGFA in uveal melanoma from TCGA database. a-c** Gene expression correlation analysis of HDAC2 and PD-L1 (a), HDAC2 and EGR1 (b), HDAC2 and VEGFA (c) in UM patients queried by TCGA database.



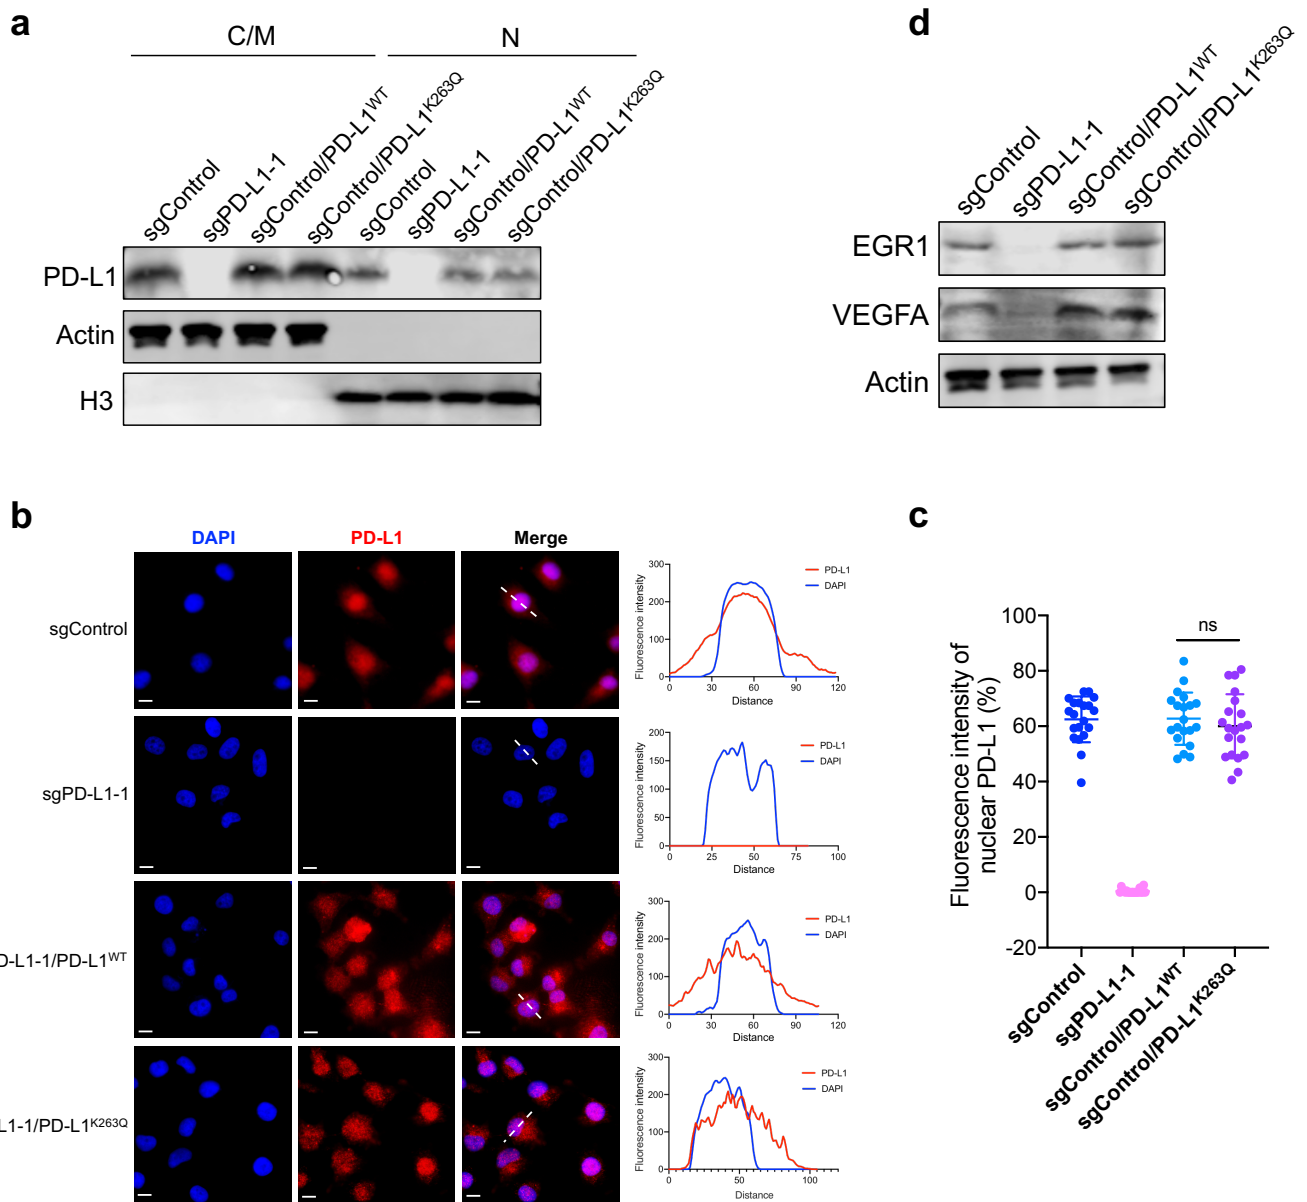

**Supplementary Fig. 16. The effect of PD-L1K263Q on PD-L1 nuclear localization.** **a** Western blot analysis of cytoplasmic/membrane (C/M) and nuclear (N) fractions of PD-L1 in MUM2B cells treated with the indicated constructs. **b** IF staining of PD-L1 in MUM2B cells treated with the indicated constructs. Left panel, representative IF staining images. Scale bars, 10  $\mu$ m. Right panel, co-localization analysis of PD-L1 and DAPI by ImageJ software. **c** Statistical analysis of nPD-L1 fluorescence intensity (%) in MUM2B cells treated with the indicated constructs.  $n = 20$ . Data are presented as means  $\pm$  SD. Two-tailed unpaired Student's  $t$ -tests. **d** Western blot images showing the protein levels of EGR1 and VEGFA in MUM2B cells treated with the indicated constructs.

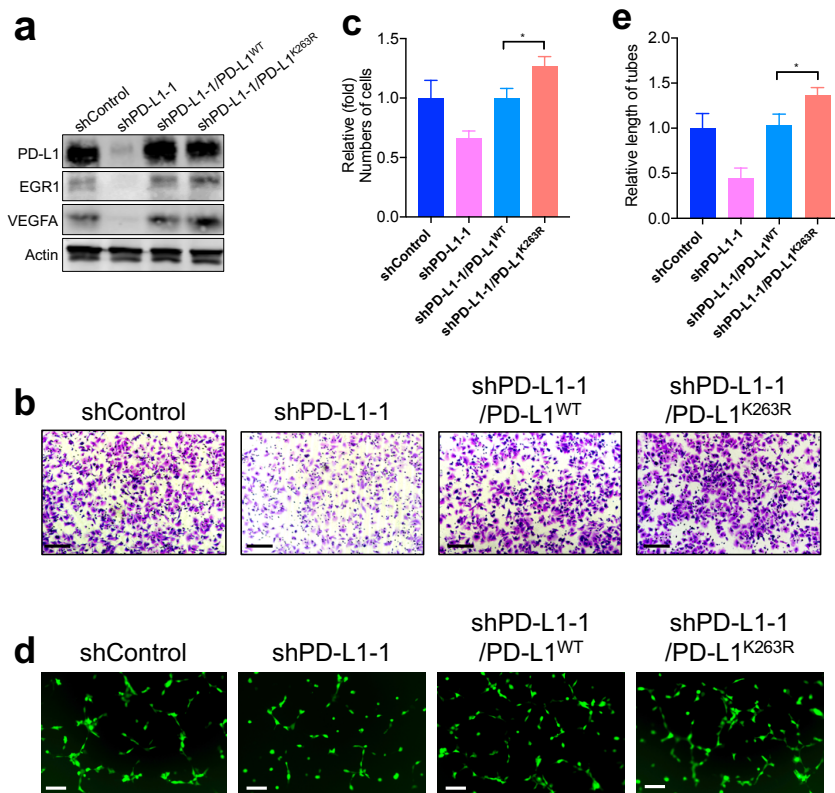

**Supplementary Fig. 17. PD-L1 K263 deacetylation facilitates angiogenesis in breast cancer cells.**

**a** Western blot images showing the protein levels of PD-L1, EGR1 and VEGFA in MDA-MB-231 cells treated with the indicated constructs. **b** HUVEC migration assay that investigates the effect of conditional medium from MDA-MB-231 cells treated with the indicated constructs on HUVECs migration ability. Scale bars, 50  $\mu$ m. **c** Statistical analysis of the HUVEC migration assay.  $n = 3$ . Data are presented as means  $\pm$  SD. Two-tailed unpaired Student's  $t$ -tests. **d** HUVEC tube formation assay that investigates the effect of conditional medium from MDA-MB-231 cells treated with the indicated constructs on HUVEC tubule formation ability. Scale bars, 25  $\mu$ m. **e** Statistical analysis of the HUVEC tube formation assay.  $n = 3$ . Data are presented as means  $\pm$  SD. Two-tailed unpaired Student's  $t$ -tests.

Fig. 1e

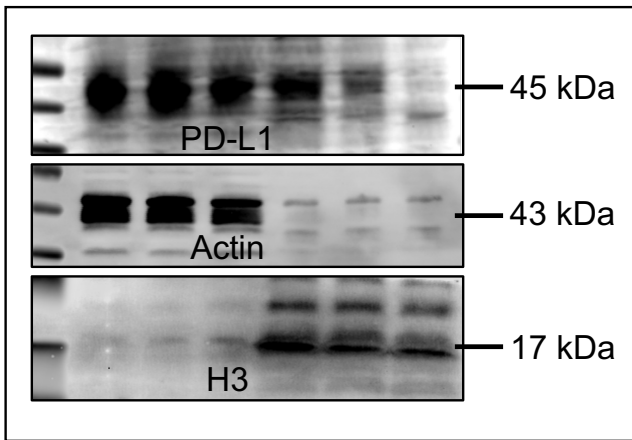

Fig. 2a

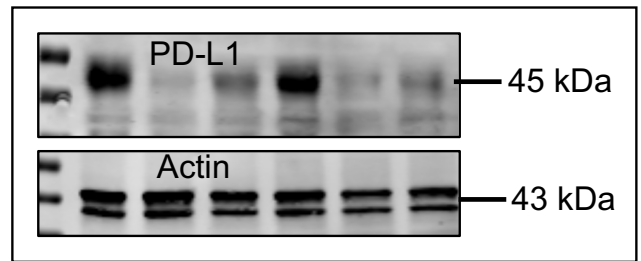

Fig. 3j

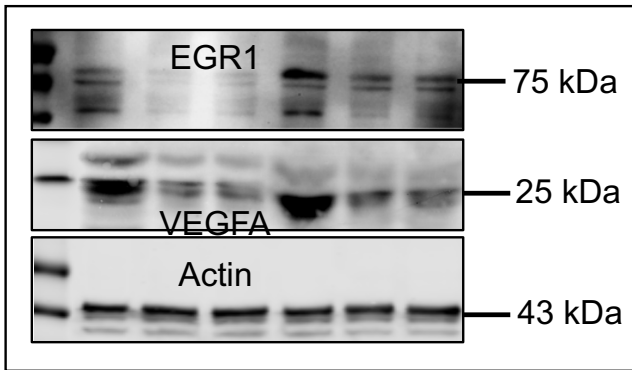

Fig. 5h

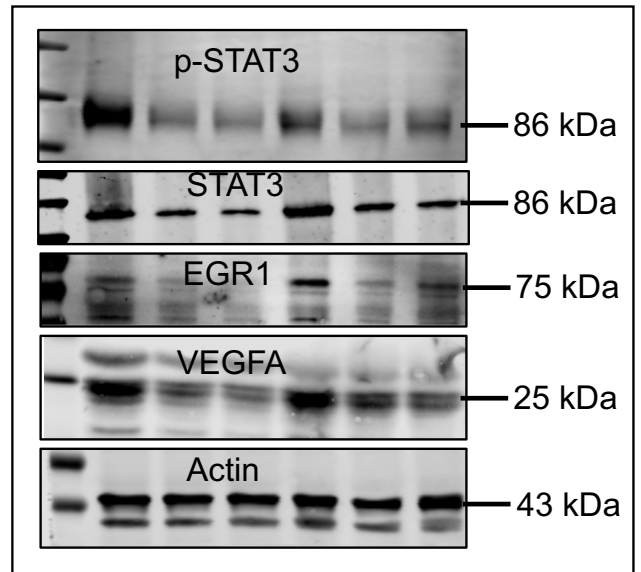

Fig. 6a

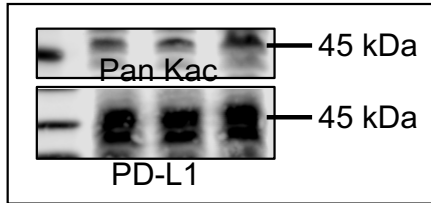

Fig. 6b

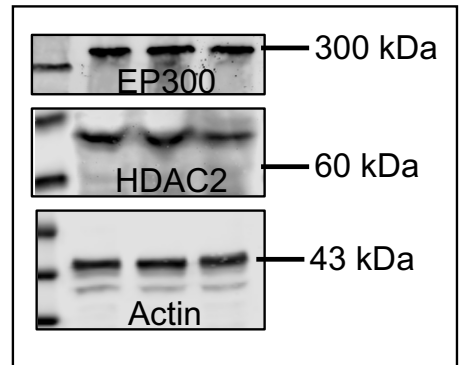

Fig. 6c

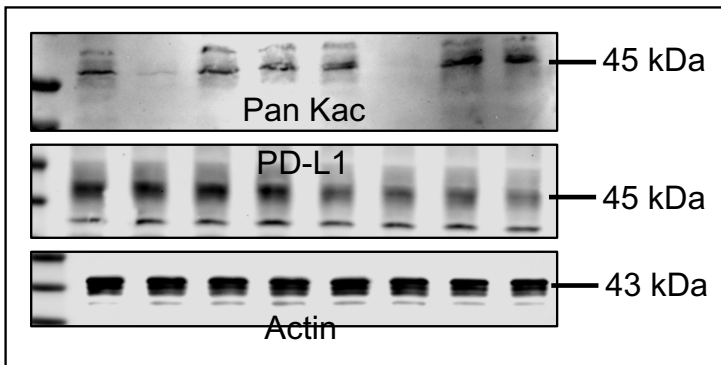

Fig. 6d

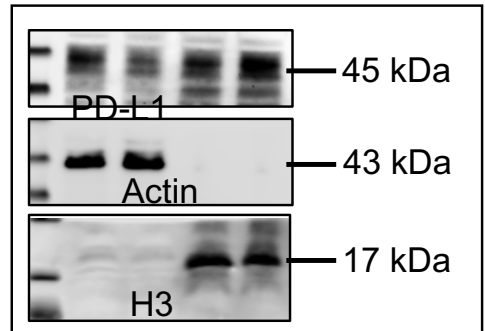

Fig. 6e

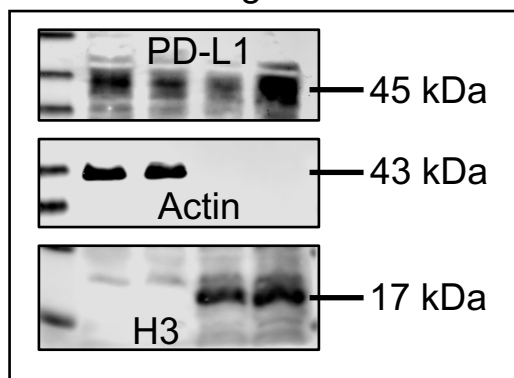

Fig. 6g

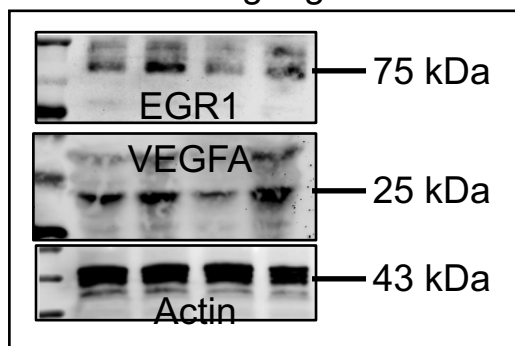

Fig. 6h

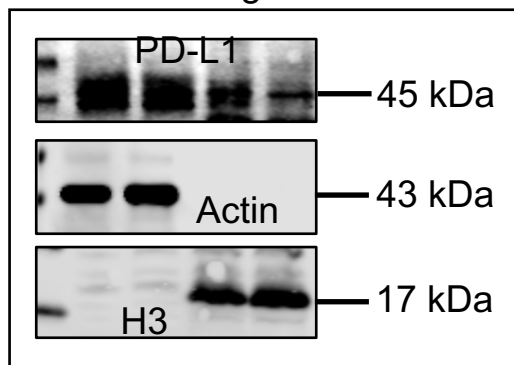

Fig. 6i

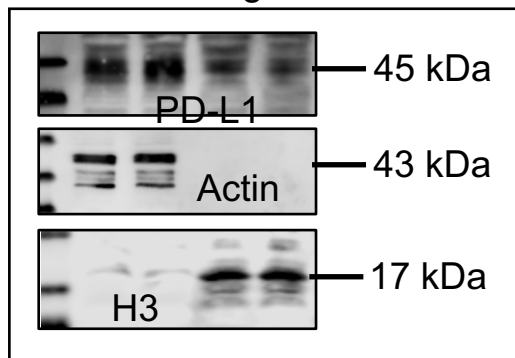

Fig. 6k

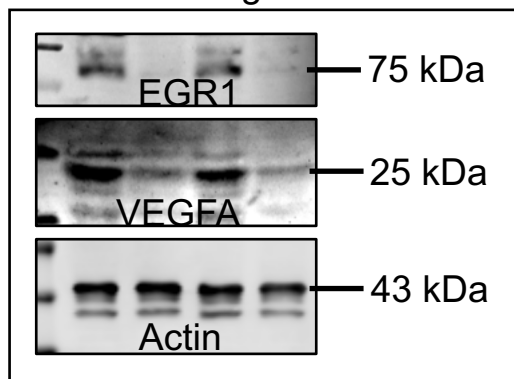

Fig. 6o

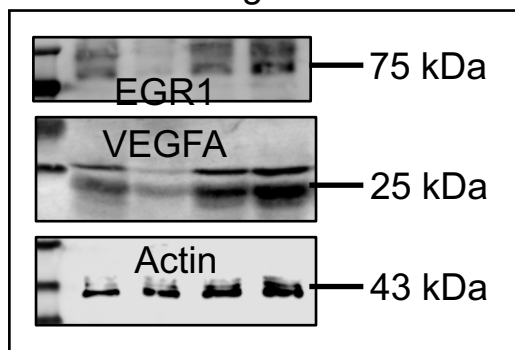

Fig. 6l

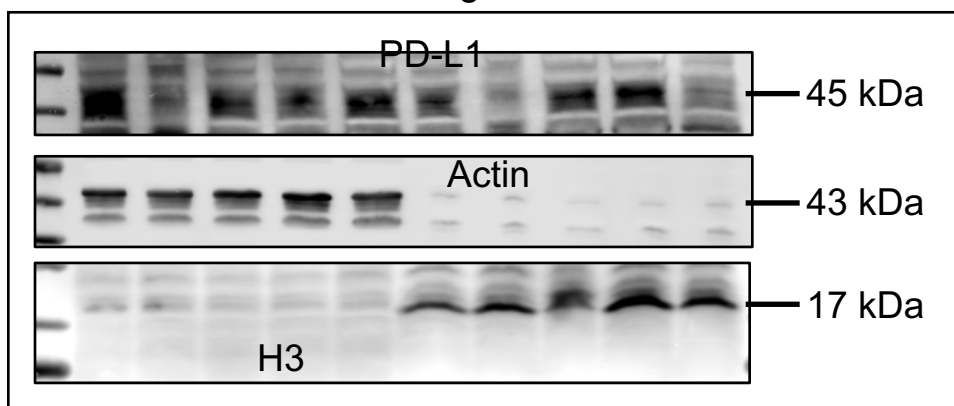

Fig. 8c

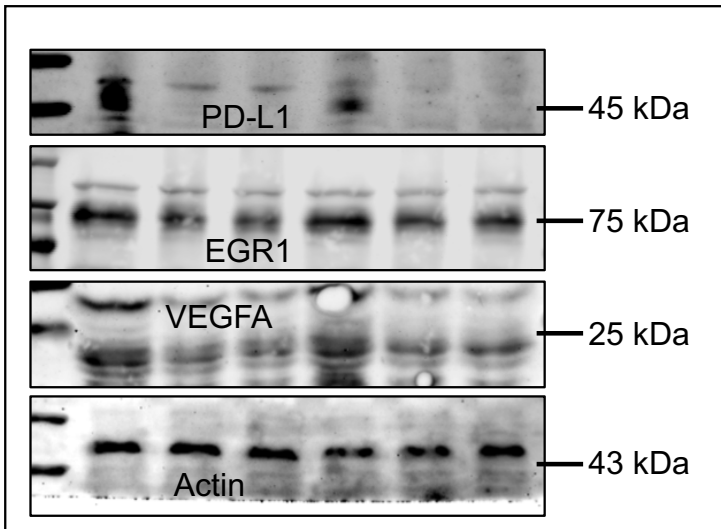

Fig. S4a

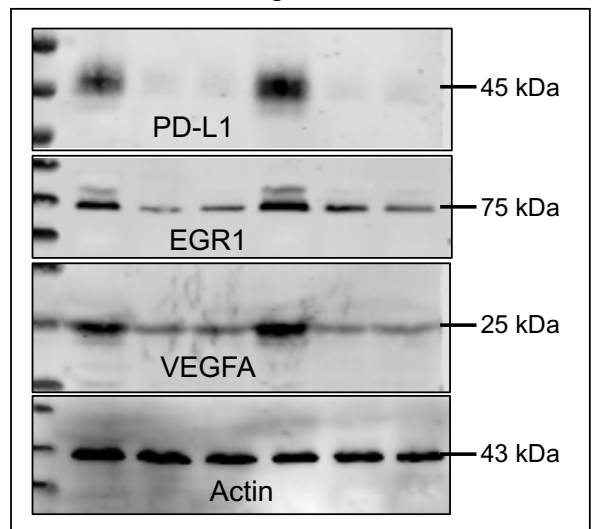

Fig. S1d

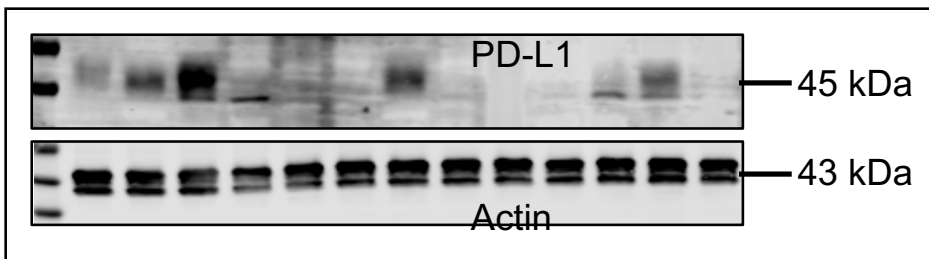

Fig. S1e

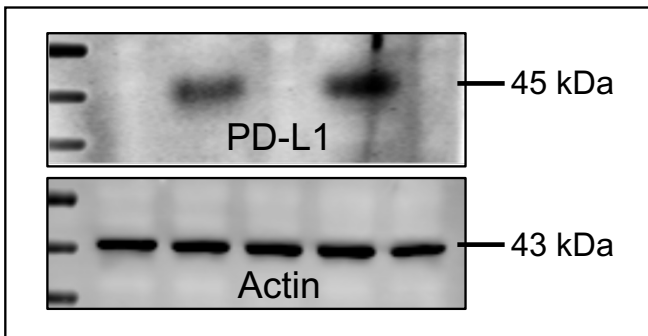

Fig. S1f

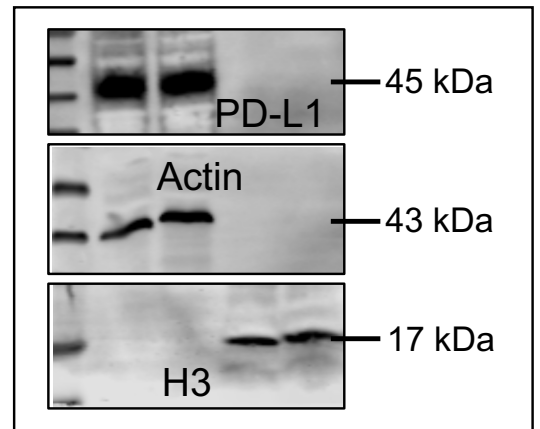

Fig. S6c

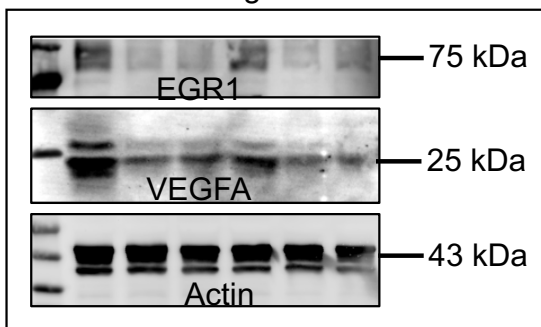

Fig. S7a

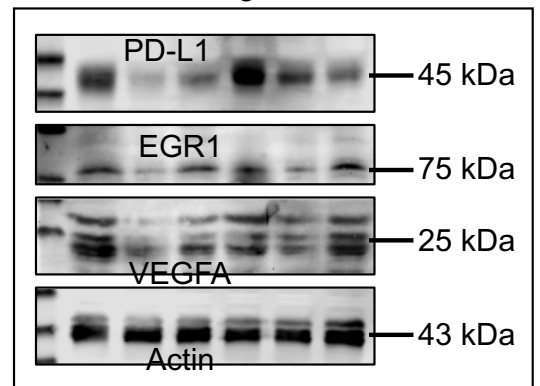

Fig. S8a

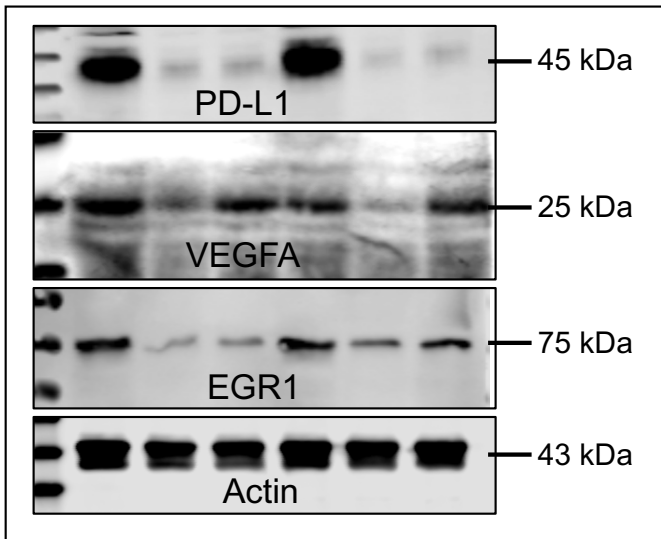

Fig. S10c

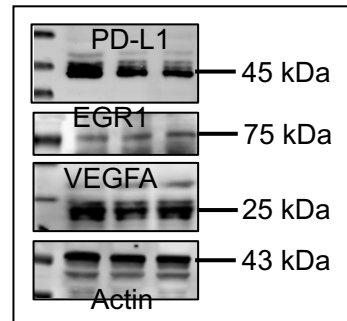

Fig. S16a

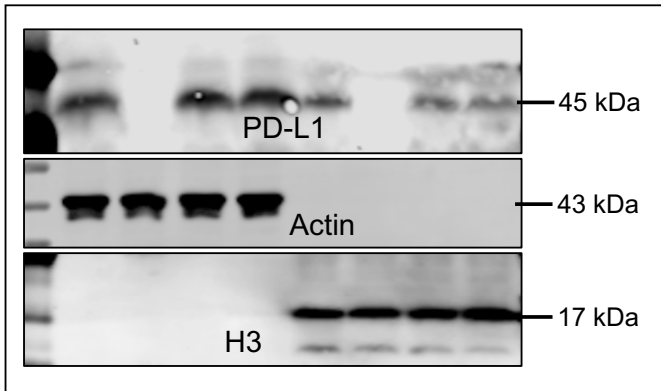

Fig. S16d

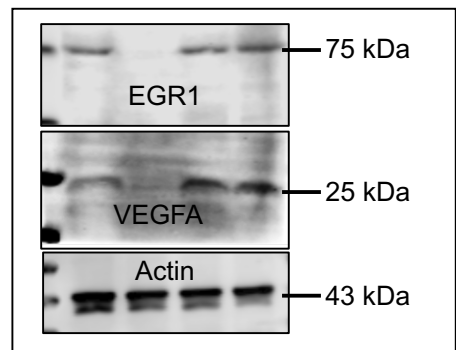

Fig. S17a

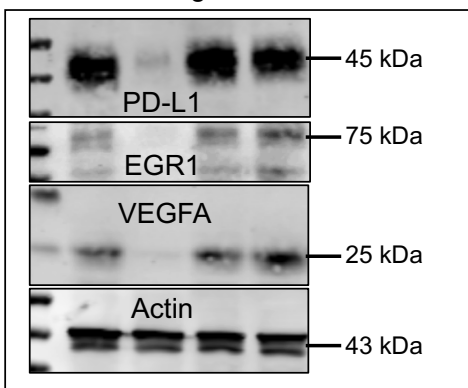

**Table S1 Clinical characteristics and nuclear PD-L1 level in uveal melanoma patient cohorts in tissue chip**

| Patient No. | Sex<br>(Female=0,<br>Male=1) | Age | Time for recurrence<br>(month, 0=No<br>recurrence) | PD-L1<br>(Negative=0,<br>Positive=1) | Nuclear PD-L1<br>proportion (%) |
|-------------|------------------------------|-----|----------------------------------------------------|--------------------------------------|---------------------------------|
| 1           | 0                            | 64  | 0                                                  | 0                                    |                                 |
| 2           | 1                            | 67  | 22                                                 | 1                                    | 45.27                           |
| 3           | 1                            | 52  | 8                                                  | 1                                    | 66.93                           |
| 4           | 1                            | 37  | 0                                                  | 0                                    |                                 |
| 5           | 1                            | 65  | 0                                                  | 1                                    | 82.74                           |
| 6           | 0                            | 45  | 13                                                 | 1                                    | 89.32                           |
| 7           | 0                            | 58  | 0                                                  | 0                                    |                                 |
| 8           | 1                            | 32  | 32                                                 | 1                                    | 66.49                           |
| 9           | 1                            | 21  | 36                                                 | 1                                    | 7.49                            |
| 10          | 0                            | 66  | 20                                                 | 1                                    | 52.76                           |
| 11          | 0                            | 69  | 0                                                  | 0                                    |                                 |
| 12          | 1                            | 65  | 0                                                  | 0                                    |                                 |
| 13          | 1                            | 23  | 13                                                 | 1                                    | 48.62                           |
| 14          | 1                            | 23  | 0                                                  | 1                                    | 4.18                            |
| 15          | 0                            | 52  | 37                                                 | 1                                    | 6.92                            |
| 16          | 1                            | 80  | 0                                                  | 0                                    |                                 |
| 17          | 0                            | 58  | 0                                                  | 1                                    | 2.05                            |
| 18          | 0                            | 70  | 0                                                  | 1                                    | 5.75                            |
| 19          | 0                            | 56  | 0                                                  | 0                                    |                                 |
| 20          | 1                            | 68  | 0                                                  | 0                                    |                                 |
| 21          | 1                            | 61  | 45                                                 | 1                                    | 4.54                            |
| 22          | 1                            | 47  | 12                                                 | 1                                    | 4                               |
| 23          | 0                            | 70  | 0                                                  | 0                                    |                                 |
| 24          | 0                            | 52  | 0                                                  | 0                                    |                                 |
| 25          | 1                            | 76  | 30                                                 | 1                                    | 7.48                            |
| 26          | 0                            | 65  | 0                                                  | 0                                    |                                 |
| 27          | 1                            | 46  | 0                                                  | 0                                    |                                 |
| 28          | 1                            | 53  | 33                                                 | 1                                    | 6.52                            |
| 29          | 1                            | 55  | 0                                                  | 0                                    |                                 |
| 30          | 1                            | 48  | 27                                                 | 1                                    | 14.52                           |

**Table S1 Clinical characteristics and nuclear PD-L1 level in conjunctival melanoma patient cohorts in tissue chip**

| Patient No. | Sex<br>(Female=0,<br>Male=1) | Age | PD-L1 (Negative=0,<br>Positive=1) | Nuclear PD-L1<br>proportion (%) |
|-------------|------------------------------|-----|-----------------------------------|---------------------------------|
| 1           | 1                            | 59  | 0                                 |                                 |
| 2           | 1                            | 54  | 1                                 | 6.89                            |
| 3           | 1                            | 76  | 0                                 |                                 |
| 4           | 1                            | 46  | 0                                 |                                 |
| 5           | 1                            | 57  | 0                                 |                                 |
| 6           | 1                            | 57  | 0                                 |                                 |
| 7           | 1                            | 59  | 0                                 |                                 |
| 8           | 1                            | 59  | 0                                 |                                 |
| 9           | 1                            | 82  | 1                                 | 4.38                            |
| 10          | 1                            | 82  | 1                                 | 1.47                            |
| 11          | 1                            | 48  | 0                                 |                                 |
| 12          | 0                            | 29  | 0                                 |                                 |
| 13          | 0                            | 49  | 0                                 |                                 |
| 14          | 0                            | 49  | 1                                 | 2.48                            |
| 15          | 1                            | 35  | 0                                 |                                 |
| 16          | 1                            | 35  | 0                                 |                                 |
| 17          | 1                            | 47  | 0                                 |                                 |
| 18          | 1                            | 52  | 1                                 | 4.95                            |
| 19          | 0                            | 77  | 0                                 |                                 |
| 20          | 0                            | 42  | 0                                 |                                 |
| 21          | 1                            | 55  | 1                                 | 0.39                            |
| 22          | 1                            | 65  | 0                                 |                                 |
| 23          | 1                            | 31  | 0                                 |                                 |
| 24          | 0                            | 67  | 1                                 | 4.5                             |
| 25          | 1                            | 52  | 0                                 |                                 |
| 26          | 1                            | 73  | 0                                 |                                 |
| 27          | 1                            | 31  | 0                                 |                                 |
| 28          | 1                            | 78  | 0                                 |                                 |
| 29          | 0                            | 42  | 0                                 |                                 |
| 30          | 1                            | 73  | 0                                 |                                 |
| 31          | 1                            | 60  | 1                                 | 3.52                            |
| 32          | 0                            | 51  | 0                                 |                                 |
| 33          | 1                            | 52  | 1                                 | 1.47                            |
| 34          | 1                            | 73  | 0                                 |                                 |
| 35          | 1                            | 81  | 0                                 |                                 |
| 36          | 1                            | 47  | 0                                 |                                 |
| 37          | 0                            | 77  | 0                                 |                                 |
| 38          | 1                            | 54  | 1                                 | 3.75                            |
| 39          | 1                            | 63  | 0                                 |                                 |
| 40          | 1                            | 38  | 1                                 | 3.75                            |
| 41          | 1                            | 70  | 0                                 |                                 |
| 42          | 1                            | 18  | 0                                 |                                 |



**Table S1 Clinical characteristics and nuclear PD-L1 level in skin cutaneous melanoma patient cohorts in tissue chip**

| <b>Patient No.</b> | <b>Sex<br/>(Female=0,<br/>Male=1)</b> | <b>Age</b> | <b>PD-L1<br/>(Negative=0,<br/>Positive=1)</b> | <b>Nuclear PD-L1<br/>proportion (%)</b> |
|--------------------|---------------------------------------|------------|-----------------------------------------------|-----------------------------------------|
| 1                  | 0                                     | 46         | 0                                             |                                         |
| 2                  | 1                                     | 60         | 0                                             |                                         |
| 3                  | 0                                     | 59         | 1                                             | 0.57                                    |
| 4                  | 1                                     | 52         | 1                                             | 2.48                                    |
| 5                  | 1                                     | 55         | 0                                             |                                         |
| 6                  | 0                                     | 38         | 0                                             |                                         |
| 7                  | 0                                     | 63         | 0                                             |                                         |
| 8                  | 0                                     | 41         | 1                                             | 3.18                                    |
| 9                  | 1                                     | 52         | 0                                             |                                         |
| 10                 | 0                                     | 59         | 1                                             | 0.48                                    |
| 11                 | 1                                     | 61         | 1                                             | 5.92                                    |
| 12                 | 1                                     | 71         | 0                                             |                                         |
| 13                 | 1                                     | 51         | 0                                             |                                         |
| 14                 | 1                                     | 45         | 1                                             | 0.49                                    |
| 15                 | 1                                     | 37         | 0                                             |                                         |
| 16                 | 1                                     | 38         | 0                                             |                                         |
| 17                 | 1                                     | 25         | 0                                             |                                         |
| 18                 | 1                                     | 65         | 1                                             | 0.19                                    |
| 19                 | 1                                     | 38         | 0                                             |                                         |
| 20                 | 0                                     | 32         | 0                                             |                                         |
| 21                 | 0                                     | 45         | 1                                             | 0.42                                    |
| 22                 | 1                                     | 40         | 1                                             | 0.85                                    |
| 23                 | 0                                     | 77         | 1                                             | 2.48                                    |
| 24                 | 1                                     | 49         | 0                                             |                                         |
| 25                 | 1                                     | 41         | 1                                             | 7.59                                    |
| 26                 | 1                                     | 51         | 1                                             | 1.48                                    |
| 27                 | 0                                     | 46         | 0                                             |                                         |
| 28                 | 1                                     | 61         | 0                                             |                                         |
| 29                 | 1                                     | 72         | 0                                             |                                         |
| 30                 | 1                                     | 49         | 1                                             | 4.28                                    |
| 31                 | 1                                     | 53         | 0                                             |                                         |
| 32                 | 1                                     | 80         | 0                                             |                                         |
| 33                 | 0                                     | 42         | 1                                             | 2.49                                    |
| 34                 | 0                                     | 88         | 0                                             |                                         |
| 35                 | 0                                     | 58         | 0                                             |                                         |

**Table S2. Primers used in this study****RT-qPCR primers:**

| <b>Gene</b>   | <b>Sequences (5'-3')</b>  |
|---------------|---------------------------|
| ACTB-Forward  | TGGCACCCAGCACAATGAA       |
| ACTB-Reverse  | CTAAGTCATAGTCCGCCTAGAAGCA |
| CD274-Forward | AAACAATTAGACCTGGCTG       |
| CD274-Reverse | TCTTACCACTCAGGACTTG       |
| PER1-Forward  | ACCTGACCGCAGAGTCTTTT      |
| PER1-Reverse  | CAAGGTGTTGCCACTGTTGG      |
| VEGFA-Forward | AGGAGGAGGGCAGAATCATCA     |
| VEGFA-Reverse | CTCGATTGGATGGCAGTAGCT     |
| STAT3-Forward | CAGCAGCTTGACACACGGTA      |
| STAT3-Reverse | AAACACCAAAGTGGCATGTGA     |

**ChIP-qPCR primers:**

| <b>Gene</b>         | <b>Sequences (5'-3')</b> |
|---------------------|--------------------------|
| EGR1-site a-Forward | CCTACCAGGGAGTGGCAAAA     |
| EGR1-site a-Reverse | ACTCCCCTGTCTACCGAGT      |
| EGR1-site b-Forward | ACACCCTCCCCACCTAATC      |
| EGR1-site b-Reverse | GTGCTTGACGACACCGAGAG     |
| EGR1-site c-Forward | TAGGGAAGCCCCTCTTTCGG     |
| EGR1-site c-Reverse | TCCTTGTGGTGAGGGGTCA      |
| EGR1-site d-Forward | GCGACCCGGAAATGCCATATAA   |
| EGR1-site d-Reverse | GGTGCTGCCCAAATAAGGGT     |
| EGR1-site e-Forward | GAAGGACCGTGATCCTTGGC     |
| EGR1-site e-Reverse | ACAGCTGACGCAAATACGGA     |
| EGR1-site f-Forward | CTCGTCCTCCAGTGATTGCTT    |
| EGR1-site f-Reverse | TGGTTTGGCTGGGGTAACTG     |
